# Supplementary material for: Understanding trends in the activity and selectivity of bi-atom catalysts for the electrochemical reduction of carbon dioxide
Source: Royal Society of Chemistry journal article supplement (doi:10.1039/d1ta01120k), 2021-01-01
Supplement: d1ta01120k1.pdf [file d1ta01120k1.pdf]

## Electronic Supplementary Material (ESI)

### Understanding Trends in Activity and Selectivity of Bi-atom Catalysts for Electrochemical Reduction of Carbon Dioxide

Fuhua Li and Qing Tang\*

School of Chemistry and Chemical Engineering, Chongqing Key Laboratory of  
Theoretical and Computational Chemistry, Chongqing University, Chongqing 401331,  
China

\*To whom correspondence should be addressed. E-mail: qingtang@cqu.edu.cn.

Table S1. The distances between the central metal atoms ( $d_{M-M}$ ) in homo-nuclear BACs and the distance between two adjacent atoms in bulk metal ( $b_{M-M}$ ), unit in angstrom (Å).

| Species | Bulk | BACs |
|---------|------|------|
| Ag      | 2.89 | 2.77 |
| Al      | 2.86 | 2.59 |
| Au      | 2.88 | 2.70 |
| Ca      | 3.95 | 3.08 |
| Co      | 2.50 | 2.25 |
| Cr      | 2.50 | 2.28 |
| Cu      | 2.56 | 2.62 |
| Fe      | 2.48 | 2.22 |
| Hf      | 3.13 | 2.98 |
| Ir      | 2.72 | 2.38 |
| Mg      | 3.20 | 2.63 |
| Mo      | 2.73 | 2.38 |
| Nb      | 2.86 | 2.54 |
| Ni      | 2.49 | 2.57 |
| Os      | 2.68 | 2.35 |
| Pd      | 2.75 | 2.63 |
| Pt      | 2.78 | 2.69 |
| Re      | 2.74 | 2.35 |
| Rh      | 2.69 | 2.36 |

|    |      |      |
|----|------|------|
| Ru | 2.65 | 2.33 |
| Sc | 3.25 | 2.95 |
| Sn | 2.81 | 3.40 |
| Sr | 4.30 | 3.27 |
| Ta | 2.86 | 2.59 |
| Ti | 2.89 | 2.61 |
| W  | 2.74 | 2.41 |
| Y  | 3.56 | 3.26 |
| Zn | 2.67 | 2.57 |
| Zr | 3.18 | 2.96 |
| Mn | 2.28 | 2.27 |
| Ga | 2.53 | 2.67 |
| Bi | 3.10 | 3.45 |

Table S2. The number of electrons ( $n_e$ ) involved in the dissolution for the pure metals, standard dissolution potentials ( $U_{\text{diss(metal)}}^0$ , pH = 0), energy of central metal atom ( $E_M$ ), the formation energy,  $E_f$ , and computed dissolution potentials ( $U_{\text{diss}}$ ) for SACs. Some of them refers from the publication of Guo et al.<sup>1</sup>

| Species | $n_e$ | $U_{\text{diss(metal)}}^0$ (V) | $E_M$ (eV) | $E_f$ (eV) | $U_{\text{diss}}$ (V) |
|---------|-------|--------------------------------|------------|------------|-----------------------|
| Ag      | 1     | 0.80                           | -2.83      | -0.23      | 1.03                  |
| Al      | 3     | -1.66                          | -3.75      | -5.04      | 0.02                  |
| Au      | 3     | 1.50                           | -3.90      | -0.09      | 1.53                  |
| Bi      | 1     | 0.50                           | -3.90      | -1.58      | 2.08                  |
| Ca      | 2     | -2.89                          | -1.96      | -4.36      | -0.71                 |
| Co      | 2     | -0.28                          | -7.11      | -3.39      | 1.41                  |
| Cr      | 2     | -0.91                          | -9.64      | -3.67      | 0.92                  |
| Cu      | 2     | 0.34                           | -4.10      | -1.69      | 1.19                  |
| Fe      | 2     | -0.45                          | -8.46      | -3.50      | 1.30                  |

---

|    |   |       |        |       |       |
|----|---|-------|--------|-------|-------|
| Ga | 3 | -0.55 | -3.04  | -2.58 | 0.31  |
| Hf | 4 | -1.55 | -9.95  | -4.20 | -0.50 |
| Ir | 3 | 1.16  | -8.86  | -2.38 | 1.95  |
| Mg | 2 | -2.37 | -0.55  | -4.78 | 0.02  |
| Mn | 2 | -1.19 | -9.16  | -3.96 | 0.79  |
| Mo | 3 | -0.20 | -10.86 | -2.41 | 0.60  |
| Nb | 3 | -1.10 | -10.11 | -3.27 | -0.01 |
| Ni | 2 | -0.26 | -5.78  | -2.95 | 1.22  |
| Os | 8 | 0.84  | -11.22 | -2.20 | 1.11  |
| Pd | 2 | 0.95  | -5.18  | -2.06 | 1.98  |
| Pt | 2 | 1.18  | -6.06  | -2.11 | 2.24  |
| Re | 3 | 0.30  | -12.44 | -2.15 | 1.02  |
| Rh | 2 | 0.60  | -7.36  | -2.76 | 1.98  |
| Ru | 2 | 0.46  | -9.28  | -2.65 | 1.78  |
| Sc | 3 | -2.08 | -6.34  | -5.31 | -0.31 |
| Sn | 2 | -0.14 | -4.01  | -2.12 | 0.92  |
| Sr | 2 | -2.90 | -1.69  | -8.62 | 1.41  |
| Ta | 3 | -0.60 | -11.86 | -2.88 | 0.36  |
| Ti | 2 | -1.63 | -7.90  | -4.32 | 0.53  |
| V  | 2 | -1.18 | -9.09  | -3.73 | 0.68  |
| W  | 3 | 0.10  | -12.96 | -2.44 | 0.91  |
| Y  | 3 | -2.37 | -6.47  | -7.33 | 0.07  |

---

|    |   |       |       |       |       |
|----|---|-------|-------|-------|-------|
| Zn | 2 | -0.76 | -1.27 | -2.16 | 0.32  |
| Zr | 4 | -1.45 | -8.55 | -3.90 | -0.48 |

Table S3. The detailed electronic energy ( $E^*$ ) and binding energy ( $E$ ) of critical intermediates ( $^*CO_2$ ,  $^*COOH$ ,  $^*CO$ , and  $^*HCOO$ ) in homonuclear BACs during electrochemical  $CO_2RR$ .

| Species | $E^*$   | $E_{^*CO_2}$ | $E_{CO_2}$ | $E_{^*COOH}$ | $E_{COOH}$ | $E_{^*CO}$ | $E_{CO}$ | $E_{^*HCOO}$ | $E_{HCOO}$ |
|---------|---------|--------------|------------|--------------|------------|------------|----------|--------------|------------|
| Bi-Bi   | -513.98 | -537.05      | -0.11      | -539.23      | 0.90       | -528.85    | 0.21     | -539.89      | -0.21      |
| Co-Co   | -524.01 | -547.09      | -0.12      | -549.87      | 0.30       | -538.89    | 0.19     | -549.55      | 0.46       |
| Cr-Cr   | -529.64 | -552.73      | -0.13      | -556.79      | -1.00      | -545.98    | -1.27    | -556.83      | -1.72      |
| Cu-Cu   | -514.60 | -537.78      | -0.22      | -539.71      | 1.04       | -529.48    | 0.20     | -540.04      | 0.51       |
| Fe-Fe   | -526.94 | -550.02      | -0.13      | -553.23      | -0.13      | -542.46    | -0.45    | -552.87      | -0.21      |
| Ga-Ga   | -514.30 | -537.41      | -0.15      | -541.04      | -0.59      | -529.31    | 0.07     | -541.70      | -1.64      |
| Ir-Ir   | -525.50 | -548.62      | -0.16      | -551.46      | 0.19       | -540.21    | 0.36     | -550.72      | 1.01       |
| MnMn    | -529.26 | -552.33      | -0.11      | -555.94      | -0.53      | -545.38    | -1.05    | -555.84      | -0.72      |
| MoMo    | -529.56 | -552.61      | -0.10      | -556.66      | -0.95      | -546.11    | -1.48    | -557.36      | -2.63      |
| Ni-Ni   | -520.48 | -543.57      | -0.13      | -545.81      | 0.83       | -535.36    | 0.20     | -545.75      | 0.93       |
| Os-Os   | -529.85 | -552.96      | -0.16      | -556.77      | -0.77      | -545.98    | -1.05    | -556.13      | 1.01       |
| Pd-Pd   | -517.50 | -540.81      | -0.36      | -543.22      | 0.43       | -532.57    | 0.00     | -542.61      | 0.91       |
| Pt-Pt   | -519.36 | -542.70      | -0.39      | -545.30      | 0.22       | -534.46    | -0.03    | -544.40      | 1.04       |
| Re-Re   | -532.17 | -555.26      | -0.12      | -559.01      | -0.68      | -548.92    | -1.67    | -559.27      | -0.31      |
| Rh-Rh   | -523.25 | -546.35      | -0.14      | -548.84      | 0.56       | -538.13    | 0.20     | -548.52      | 1.03       |
| Ru-Ru   | -526.87 | -549.98      | -0.15      | -553.65      | -0.62      | -542.78    | -0.83    | -553.15      | 0.09       |

|       |         |         |       |         |       |         |       |         |       |
|-------|---------|---------|-------|---------|-------|---------|-------|---------|-------|
| Sn-Sn | -515.29 | -538.35 | -0.11 | -541.39 | 0.05  | -530.13 | 0.23  | -541.78 | -0.14 |
| Sr-Sr | -524.23 | -547.51 | -0.33 | -549.92 | 0.46  | -539.27 | 0.03  | -551.25 | -1.40 |
| Ta-Ta | -532.50 | -557.13 | -1.67 | -560.22 | -1.57 | -549.02 | -1.44 | -561.58 | -4.06 |
| Ti-Ti | -527.46 | -551.27 | -0.85 | -554.67 | -1.05 | -543.47 | -0.93 | -556.11 | -3.57 |
| V-V   | -528.66 | -551.85 | -0.24 | -555.55 | -0.74 | -544.83 | -1.10 | -556.80 | -3.19 |
| W-W   | -533.81 | -556.88 | -0.12 | -560.49 | -0.52 | -549.76 | -0.88 | -561.27 | -2.14 |
| Zn-Zn | -509.88 | -532.96 | -0.12 | -535.59 | 0.44  | -524.73 | 0.22  | -536.06 | -0.40 |
| Ag-Ag | -509.14 |         |       |         |       |         |       |         |       |
| Al-Al | -520.60 |         |       |         |       |         |       |         |       |
| Au-Au | -511.00 |         |       |         |       |         |       |         |       |
| Ca-Ga | -515.65 |         |       |         |       |         |       |         |       |
| Hf-Hf | -531.33 |         |       |         |       |         |       |         |       |
| MgMg  | -513.68 |         |       |         |       |         |       |         |       |
| Nb-Nb | -529.77 |         |       |         |       |         |       |         |       |
| Sc-Sc | -526.32 |         |       |         |       |         |       |         |       |
| Y-Y   | -530.61 |         |       |         |       |         |       |         |       |
| Zr-Zr | -527.91 |         |       |         |       |         |       |         |       |

Table S4. The detailed electronic energy ( $E^*$ ) and binding energy ( $E$ ) of critical intermediates ( $^*CO_2$ ,  $^*COOH$ ,  $^*CO$ ,  $^*H$ , and  $^*HCOO$ ) in Mo-based heteronuclear BACs during electrochemical  $CO_2RR$ .

| Species | Mo-Fe   | Mo-Co   | Mo-Ir   | Mo-Rh   | Mo-Ni   | Mo-Cu   | Mo-Zn   | Mo-Ga   |
|---------|---------|---------|---------|---------|---------|---------|---------|---------|
| $E^*$   | -528.60 | -527.34 | -528.41 | -527.17 | -525.25 | -522.24 | -520.01 | -521.30 |

|                     |         |         |         |         |         |         |         |         |
|---------------------|---------|---------|---------|---------|---------|---------|---------|---------|
| $E^*_{\text{CO}_2}$ | -552.32 | -550.52 | -551.50 | -550.26 | -548.32 | -545.31 | -543.23 | -545.26 |
| $E_{\text{CO}_2}$   | -0.76   | -0.23   | -0.13   | -0.13   | -0.11   | -0.11   | -0.26   | -1.00   |
| $E^*_{\text{COOH}}$ | -555.45 | -553.26 | -554.37 | -552.72 | -550.65 | -548.15 | -546.62 | -548.11 |
| $E_{\text{COOH}}$   | -0.70   | 0.23    | 0.20    | 0.60    | 0.76    | 0.25    | -0.46   | -0.65   |
| $E^*_{\text{CO}}$   | -545.16 | -543.94 | -544.98 | -543.74 | -541.96 | -538.95 | -536.67 | -537.90 |
| $E_{\text{CO}}$     | -1.48   | -1.53   | -1.50   | -1.50   | -1.63   | -1.63   | -1.59   | -1.51   |
| $E^*_{\text{H}}$    | -532.59 | -531.49 | -532.54 | -531.31 | -529.44 | -526.42 | -524.13 | -525.35 |
| $E_{\text{H}}$      | -0.54   | -0.71   | -0.69   | -0.69   | -0.74   | -0.73   | -0.68   | -0.59   |
| $E^*_{\text{HCOO}}$ | -556.41 | -555.16 | -556.17 | -554.97 | -553.09 | -550.05 | -548.07 | -549.63 |
| $E_{\text{HCOO}}$   | -1.65   | -1.67   | -1.61   | -1.64   | -1.68   | -1.65   | -1.91   | -2.17   |

Table S5. The detailed electronic energy ( $E^*$ ) and binding energy ( $E$ ) of critical intermediates ( $^*\text{CO}_2$ ,  $^*\text{COOH}$ ,  $^*\text{CO}$ ,  $^*\text{H}$ , and  $^*\text{HCOO}$ ) in Ta-based heteronuclear BACs during electrochemical  $\text{CO}_2\text{RR}$ .

| Species             | Ta-Fe   | Ta-Co   | Ta-Ir   | Ta-Rh   | Ta-Ni   | Ta-Cu   | Ta-Zn   | Ta-Ga   |
|---------------------|---------|---------|---------|---------|---------|---------|---------|---------|
| $E^*$               | -530.26 | -529.04 | -530.08 | -528.89 | -527.40 | -524.33 | -522.05 | -523.37 |
| $E^*_{\text{CO}_2}$ | -555.00 | -553.49 | -554.35 | -553.14 | -551.98 | -548.93 | -546.63 | -548.28 |
| $E_{\text{CO}_2}$   | -1.79   | -1.50   | -1.31   | -1.30   | -1.63   | -1.64   | -1.62   | -1.95   |
| $E^*_{\text{COOH}}$ | -558.23 | -556.09 | -556.93 | -555.51 | -553.46 | -551.29 | -549.28 | -550.89 |
| $E_{\text{COOH}}$   | -1.82   | -0.89   | -0.69   | -0.47   | 0.29    | -0.81   | -1.07   | -1.36   |
| $E^*_{\text{CO}}$   | -546.77 | -545.69 | -546.80 | -545.56 | -543.91 | -540.90 | -538.64 | -539.96 |
| $E_{\text{CO}}$     | -1.44   | -1.57   | -1.64   | -1.59   | -1.43   | -1.49   | -1.51   | -1.51   |
| $E^*_{\text{H}}$    | -534.89 | -533.68 | -534.66 | -533.44 | -532.06 | -528.98 | -526.66 | -527.93 |

|             |         |         |         |         |         |         |         |         |
|-------------|---------|---------|---------|---------|---------|---------|---------|---------|
| $E_H$       | -1.19   | -1.19   | -1.12   | -1.10   | -1.22   | -1.20   | -1.16   | -1.11   |
| $E_{*HCOO}$ | -559.22 | -558.05 | -559.02 | -557.82 | -556.39 | -553.29 | -550.93 | -552.51 |
| $E_{HCOO}$  | -2.81   | -2.86   | -2.78   | -2.77   | -2.84   | -2.80   | -2.73   | -2.99   |

Table S6. The detailed electronic energy ( $E^*$ ) and binding energy ( $E$ ) of critical intermediates ( $*CO_2$ ,  $*COOH$ ,  $*CO$ ,  $*H$ , and  $*HCOO$ ) in V-based heteronuclear BACs during electrochemical  $CO_2RR$ .

| Species     | V-Fe    | V-Co    | V-Ir    | V-Rh    | V-Ni    | V-Cu    | V-Zn    | V-Ga    |
|-------------|---------|---------|---------|---------|---------|---------|---------|---------|
| $E^*$       | -528.40 | -527.11 | -528.09 | -526.82 | -525.46 | -522.25 | -519.85 | -521.41 |
| $E_{*CO_2}$ | -552.25 | -550.86 | -551.78 | -550.48 | -548.54 | -545.31 | -542.94 | -545.31 |
| $E_{CO_2}$  | -0.89   | -0.79   | -0.73   | -0.70   | -0.12   | 0.10    | -0.13   | -0.94   |
| $E_{*COOH}$ | -555.76 | -553.71 | -554.64 | -553.21 | -551.20 | -548.14 | -546.57 | -548.51 |
| $E_{COOH}$  | -1.21   | -0.45   | -0.39   | -0.23   | 0.61    | 0.47    | -0.56   | -0.94   |
| $E_{*CO}$   | -544.52 | -543.47 | -544.46 | -543.16 | -541.62 | -538.45 | -536.07 | -537.60 |
| $E_{CO}$    | -1.05   | -1.28   | -1.29   | -1.26   | -1.08   | -1.12   | -1.14   | -1.11   |
| $E_{*H}$    | -532.00 | -530.78 | -531.70 | -530.43 | -529.17 | -525.94 | -523.52 | -525.08 |
| $E_H$       | -0.15   | -0.22   | -0.17   | -0.16   | -0.26   | -0.24   | -0.22   | -0.22   |
| $E_{*HCOO}$ | -556.45 | -554.82 | -555.78 | -554.54 | -553.24 | -550.06 | -548.03 | -550.04 |
| $E_{HCOO}$  | -1.89   | -1.56   | -1.53   | -1.56   | -1.63   | -1.65   | -2.03   | -2.48   |

Table S7. The detailed electronic energy ( $E^*$ ) and binding energy ( $E$ ) of critical intermediates ( $*CO_2$ ,  $*COOH$ ,  $*CO$ ,  $*H$ , and  $*HCOO$ ) in Ti-based heteronuclear BACs during electrochemical  $CO_2RR$ .

| Species | Ti-Fe | Ti-Co | Ti-Ir | Ti-Rh | Ti-Ni | Ti-Cu | Ti-Zn | Ti-Ga |
|---------|-------|-------|-------|-------|-------|-------|-------|-------|
|---------|-------|-------|-------|-------|-------|-------|-------|-------|

|                     |         |         |         |         |         |         |         |         |
|---------------------|---------|---------|---------|---------|---------|---------|---------|---------|
| $E^*$               | -527.65 | -526.44 | -527.47 | -526.20 | -524.82 | -521.65 | -519.31 | -520.88 |
| $E^*_{\text{CO}_2}$ | -551.90 | -550.64 | -551.55 | -550.25 | -548.30 | -545.17 | -542.83 | -545.19 |
| $E_{\text{CO}_2}$   | -1.30   | -1.25   | -1.12   | -1.09   | -0.52   | -0.57   | -0.56   | -1.35   |
| $E^*_{\text{COOH}}$ | -555.39 | -553.70 | -554.67 | -553.22 | -551.01 | -548.03 | -546.29 | -548.53 |
| $E_{\text{COOH}}$   | -1.59   | -1.11   | -1.04   | -0.86   | 0.17    | -0.23   | -0.83   | -1.50   |
| $E^*_{\text{CO}}$   | -543.54 | -542.36 | -543.35 | -542.09 | -540.83 | -537.65 | -535.32 | -537.04 |
| $E_{\text{CO}}$     | -0.82   | -0.85   | -0.80   | -0.81   | -0.93   | -0.93   | -0.94   | -1.09   |
| $E^*_{\text{H}}$    | -531.15 | -529.99 | -530.94 | -529.61 | -528.56 | -525.37 | -523.02 | -524.91 |
| $E_{\text{H}}$      | -0.06   | -0.10   | -0.02   | 0.04    | -0.29   | -0.27   | -0.27   | -0.59   |
| $E^*_{\text{HCOO}}$ | -555.74 | -554.57 | -555.56 | -554.34 | -553.15 | -549.99 | -547.84 | -550.09 |
| $E_{\text{HCOO}}$   | -1.89   | -1.56   | -1.53   | -1.56   | -1.63   | -1.65   | -2.03   | -2.48   |

Table S8. The detailed electronic energy ( $E^*$ ) and binding energy ( $E$ ) of critical intermediates ( $^*\text{CO}_2$ ,  $^*\text{COOH}$ ,  $^*\text{CO}$ ,  $^*\text{H}$ , and  $^*\text{HCOO}$ ) in Cr-based heteronuclear BACs during electrochemical  $\text{CO}_2\text{RR}$ .

| Species             | Cr-Fe   | Cr-Co   | Cr-Ir   | Cr-Rh   | Cr-Ni   | Cr-Cu   | Cr-Zn   | Cr-Ga   |
|---------------------|---------|---------|---------|---------|---------|---------|---------|---------|
| $E^*$               | -528.19 | -526.94 | -527.81 | -526.56 | -524.73 | -521.57 | -519.20 | -521.30 |
| $E^*_{\text{CO}_2}$ | -551.38 | -550.04 | -550.92 | -549.67 | -547.83 | -544.67 | -542.30 | -544.41 |
| $E_{\text{CO}_2}$   | -0.23   | -0.14   | -0.15   | -0.14   | -0.14   | -0.14   | -0.14   | -0.15   |
| $E^*_{\text{COOH}}$ | -554.77 | -552.72 | -553.73 | -552.32 | -549.94 | -546.68 | -545.34 | -548.00 |
| $E_{\text{COOH}}$   | -0.43   | 0.37    | 0.23    | 0.40    | 0.95    | 1.05    | 0.01    | -0.54   |
| $E^*_{\text{CO}}$   | -544.63 | -543.49 | -544.41 | -543.12 | -541.52 | -538.29 | -535.88 | -537.47 |
| $E_{\text{CO}}$     | -1.05   | -0.88   | -0.91   | -0.89   | -0.88   | -0.91   | -1.00   | -0.87   |



|             |         |         |         |         |         |         |         |         |
|-------------|---------|---------|---------|---------|---------|---------|---------|---------|
| $E_{*H}$    | -532.04 | -530.88 | -531.81 | -530.53 | -528.89 | -525.65 | -523.21 | -524.66 |
| $E_H$       | -0.10   | 0.10    | 0.06    | 0.07    | 0.12    | 0.10    | 0.05    | 0.31    |
| $E_{*HCOO}$ | -555.99 | -554.40 | -555.23 | -553.98 | -552.52 | -549.32 | -547.44 | -549.59 |
| $E_{HCOO}$  | -1.34   | -0.71   | -0.66   | -0.67   | -0.80   | -0.86   | -1.47   | -1.91   |

Table S9. The detailed electronic energy ( $E^*$ ) and binding energy ( $E$ ) of critical intermediates ( $*CO_2$ ,  $*COOH$ ,  $*CO$ ,  $*H$ , and  $*HCOO$ ) in Mn-based heteronuclear BACs during electrochemical  $CO_2RR$ .

| Species     | Mn-Fe   | Mn-Co   | Mn-Ir   | Mn-Rh   | Mn-Ni   | Mn-Cu   | Mn-Zn   | Mn-Ga   |
|-------------|---------|---------|---------|---------|---------|---------|---------|---------|
| $E^*$       | -528.19 | -526.94 | -527.81 | -526.56 | -524.73 | -521.57 | -519.20 | -521.30 |
| $E_{*CO_2}$ | -551.38 | -550.04 | -550.92 | -549.67 | -547.83 | -544.67 | -542.30 | -544.41 |
| $E_{CO_2}$  | -0.23   | -0.14   | -0.15   | -0.14   | -0.14   | -0.14   | -0.14   | -0.15   |
| $E_{*COOH}$ | -554.77 | -552.72 | -553.73 | -552.32 | -549.94 | -546.68 | -545.34 | -548.00 |
| $E_{COOH}$  | -0.43   | 0.37    | 0.23    | 0.40    | 0.95    | 1.05    | 0.01    | -0.54   |
| $E_{*CO}$   | -544.11 | -542.77 | -543.58 | -542.38 | -540.65 | -537.38 | -535.04 | -537.05 |
| $E_{CO}$    | -0.85   | -0.75   | -0.70   | -0.74   | -0.84   | -0.74   | -0.76   | -0.67   |
| $E_{*H}$    | -531.49 | -530.14 | -531.01 | -529.75 | -528.01 | -524.75 | -522.38 | -524.47 |
| $E_H$       | 0.15    | 0.25    | 0.24    | 0.26    | 0.17    | 0.27    | 0.27    | 0.28    |
| $E_{*HCOO}$ | -554.91 | -553.28 | -554.08 | -552.84 | -551.35 | -548.23 | -546.46 | -549.04 |
| $E_{HCOO}$  | -0.56   | -0.19   | -0.12   | -0.12   | -0.46   | -0.51   | -1.11   | -1.58   |

Table S10. The detailed electronic energy ( $E^*$ ), zero-point energy ( $E_{ZPE}$ ), entropy corrections ( $TS$ ), free energy ( $G$ ), and Gibbs free energy change ( $\Delta G$ ) of critical intermediate in Mo-based

heteronuclear BACs during electrochemical CO<sub>2</sub>RR towards C1 product and competitive HER product.

| Species | $E^*$   | $E^*_{\text{CO}_2}$  | $E_{\text{ZPE}}$ | TS   | $G$     | $\Delta G$ | $E^*_{\text{COOH}}$ | $E_{\text{ZPE}}$ | TS   | $G$     | $\Delta G$ |
|---------|---------|----------------------|------------------|------|---------|------------|---------------------|------------------|------|---------|------------|
| Mo-Fe   | -528.60 | -552.32              | 0.32             | 0.14 | -552.15 | -0.33      | -555.45             | 0.64             | 0.16 | -554.98 | 0.36       |
| Mo-Co   | -527.34 | -550.52              | 0.32             | 0.16 | -550.36 | 0.18       | -553.26             | 0.62             | 0.18 | -552.81 | 0.75       |
| Mo-Ir   | -528.41 | -551.50              | 0.32             | 0.23 | -551.41 | 0.20       | -554.37             | 0.62             | 0.17 | -553.91 | 0.70       |
| Mo-Rh   | -527.17 | -550.26              | 0.32             | 0.24 | -550.18 | 0.19       | -552.72             | 0.63             | 0.16 | -552.25 | 1.13       |
| Mo-Ni   | -525.25 | -548.32              | 0.30             | 0.19 | -548.21 | 0.25       | -550.65             | 0.61             | 0.12 | -550.17 | 1.24       |
| Mo-Cu   | -522.24 | -545.31              | 0.29             | 0.18 | -545.20 | 0.25       | -548.15             | 0.62             | 0.17 | -547.69 | 0.70       |
| Mo-Zn   | -520.01 | -543.23              | 0.29             | 0.15 | -543.09 | 0.13       | -546.62             | 0.63             | 0.17 | -546.16 | 0.12       |
| Mo-Ga   | -521.30 | -545.26              | 0.31             | 0.15 | -545.10 | -0.59      | -548.11             | 0.63             | 0.17 | -547.65 | 0.65       |
|         |         | $E^*_{\text{CO}}$    | $E_{\text{ZPE}}$ | TS   | $G$     | $\Delta G$ | $E^*_{\text{HCOO}}$ | $E_{\text{ZPE}}$ | TS   | $G$     | $\Delta G$ |
| Mo-Fe   |         | -545.16              | 0.21             | 0.13 | -545.08 | -0.99      | -556.41             | 0.61             | 0.15 | -555.96 | -0.36      |
| Mo-Co   |         | -543.94              | 0.20             | 0.13 | -543.87 | -1.94      | -555.16             | 0.61             | 0.23 | -554.78 | -0.98      |
| Mo-Ir   |         | -544.98              | 0.21             | 0.13 | -544.90 | -1.88      | -556.17             | 0.60             | 0.24 | -555.80 | -0.94      |
| Mo-Rh   |         | -543.74              | 0.20             | 0.14 | -543.68 | -2.32      | -554.97             | 0.61             | 0.22 | -554.58 | -0.95      |
| Mo-Ni   |         | -541.96              | 0.32             | 0.14 | -541.78 | -2.49      | -553.09             | 0.61             | 0.23 | -552.71 | -1.05      |
| Mo-Cu   |         | -538.95              | 0.20             | 0.15 | -538.89 | -2.09      | -550.05             | 0.60             | 0.18 | -549.63 | -0.98      |
| Mo-Zn   |         | -536.67              | 0.21             | 0.13 | -536.60 | -1.32      | -548.07             | 0.64             | 0.17 | -547.60 | -1.07      |
| Mo-Ga   |         | -537.90              | 0.20             | 0.13 | -537.82 | -1.06      | -549.63             | 0.65             | 0.15 | -549.14 | -0.59      |
|         |         | $E^*_{\text{HCOOH}}$ | $E_{\text{ZPE}}$ | TS   | $G$     | $\Delta G$ |                     |                  |      |         |            |
| Mo-Fe   |         | -559.17              | 0.93             | 0.24 | -558.48 | 0.92       |                     |                  |      |         |            |
| Mo-Co   |         | -557.82              | 0.92             | 0.25 | -557.14 | 1.09       |                     |                  |      |         |            |
| Mo-Ir   |         | -558.89              | 0.92             | 0.26 | -558.22 | 1.02       |                     |                  |      |         |            |
| Mo-Rh   |         | -557.70              | 0.92             | 0.24 | -557.02 | 1.01       |                     |                  |      |         |            |
| Mo-Ni   |         | -555.80              | 0.92             | 0.25 | -555.13 | 1.03       |                     |                  |      |         |            |
| Mo-Cu   |         | -552.61              | 0.92             | 0.25 | -551.94 | 1.13       |                     |                  |      |         |            |
| Mo-Zn   |         | -550.29              | 0.92             | 0.27 | -549.64 | 1.40       |                     |                  |      |         |            |
| Mo-Ga   |         | -552.49              | 0.93             | 0.28 | -551.83 | 0.75       |                     |                  |      |         |            |
|         |         | $E^*_{\text{H}}$     | $E_{\text{ZPE}}$ | TS   | $G$     | $\Delta G$ | $E^*_{\text{H}_2}$  | $E_{\text{ZPE}}$ | TS   | $G$     | $\Delta G$ |
| Mo-Fe   |         | -532.59              | 0.18             | 0.02 | -532.42 | -0.37      | -535.35             | 0.29             | 0.17 | -535.23 | 0.64       |
| Mo-Co   |         | -531.49              | 0.18             | 0.01 | -531.32 | -0.54      | -534.09             | 0.31             | 0.18 | -533.96 | 0.82       |
| Mo-Ir   |         | -532.54              | 0.19             | 0.01 | -532.37 | -0.52      | -535.16             | 0.31             | 0.19 | -535.04 | 0.78       |
| Mo-Rh   |         | -531.31              | 0.18             | 0.01 | -531.14 | -0.52      | -533.92             | 0.31             | 0.19 | -533.80 | 0.79       |
| Mo-Ni   |         | -529.44              | 0.18             | 0.01 | -529.27 | -0.57      | -532.01             | 0.32             | 0.02 | -531.71 | 1.01       |
| Mo-Cu   |         | -526.42              | 0.15             | 0.01 | -526.27 | -0.58      | -528.99             | 0.37             | 0.11 | -528.73 | 0.99       |
| Mo-Zn   |         | -524.13              | 0.18             | 0.01 | -523.96 | -0.51      | -526.77             | 0.27             | 0.07 | -526.57 | 0.85       |
| Mo-Ga   |         | -525.35              | 0.18             | 0.02 | -525.18 | -0.43      | -528.06             | 0.30             | 0.14 | -527.90 | 0.73       |

Table S11. The detailed electronic energy ( $E^*$ ), zero-point energy ( $E_{\text{ZPE}}$ ), entropy corrections (TS),

free energy ( $G$ ), and Gibbs free energy change ( $\Delta G$ ) of critical intermediate in Ta-based heteronuclear BACs during electrochemical CO<sub>2</sub>RR towards C1 product and competitive HER product.

| Species | $E^*$   | $E^*_{\text{CO}_2}$  | $E_{\text{ZPE}}$ | TS   | $G$     | $\Delta G$ | $E^*_{\text{COOH}}$ | $E_{\text{ZPE}}$ | TS   | $G$     | $\Delta G$ |
|---------|---------|----------------------|------------------|------|---------|------------|---------------------|------------------|------|---------|------------|
| Ta-Fe   | -530.26 | -555.00              | 0.31             | 0.16 | -554.85 | -1.39      | -558.23             | 0.63             | 0.17 | -557.77 | 0.28       |
| Ta-Co   | -529.04 | -553.49              | 0.31             | 0.17 | -553.35 | -1.10      | -556.09             | 0.61             | 0.19 | -555.66 | 0.88       |
| Ta-Ir   | -530.08 | -554.35              | 0.32             | 0.15 | -554.17 | -0.88      | -556.93             | 0.64             | 0.16 | -556.46 | 0.91       |
| Ta-Rh   | -528.89 | -553.14              | 0.32             | 0.15 | -552.97 | -0.87      | -555.51             | 0.63             | 0.16 | -555.05 | 1.12       |
| Ta-Ni   | -527.40 | -551.98              | 0.30             | 0.19 | -551.86 | -1.26      | -553.46             | 0.63             | 0.16 | -552.99 | 2.07       |
| Ta-Cu   | -524.33 | -548.93              | 0.30             | 0.19 | -548.82 | -1.28      | -551.29             | 0.62             | 0.17 | -550.84 | 1.18       |
| Ta-Zn   | -522.05 | -546.63              | 0.30             | 0.18 | -546.51 | -1.25      | -549.28             | 0.62             | 0.18 | -548.84 | 0.87       |
| Ta-Ga   | -523.37 | -548.28              | 0.30             | 0.16 | -548.14 | -1.56      | -550.89             | 0.63             | 0.18 | -550.44 | 0.89       |
|         |         | $E^*_{\text{CO}}$    | $E_{\text{ZPE}}$ | TS   | $G$     | $\Delta G$ | $E^*_{\text{HCOO}}$ | $E_{\text{ZPE}}$ | TS   | $G$     | $\Delta G$ |
| Ta-Fe   |         | -546.77              | 0.19             | 0.10 | -546.69 | 0.19       | -559.22             | 0.63             | 0.14 | -558.73 | -0.43      |
| Ta-Co   |         | -545.69              | 0.19             | 0.09 | -545.59 | -0.81      | -558.05             | 0.60             | 0.25 | -557.71 | -0.91      |
| Ta-Ir   |         | -546.80              | 0.19             | 0.16 | -546.76 | -1.19      | -559.02             | 0.61             | 0.23 | -558.64 | -1.02      |
| Ta-Rh   |         | -545.56              | 0.19             | 0.15 | -545.52 | -1.36      | -557.82             | 0.60             | 0.24 | -557.45 | -1.04      |
| Ta-Ni   |         | -543.91              | 0.20             | 0.14 | -543.86 | -1.75      | -556.39             | 0.61             | 0.24 | -556.02 | -0.71      |
| Ta-Cu   |         | -540.90              | 0.23             | 0.15 | -540.82 | -0.86      | -553.29             | 0.61             | 0.24 | -552.93 | -0.66      |
| Ta-Zn   |         | -538.64              | 0.19             | 0.04 | -538.49 | -0.54      | -550.93             | 0.63             | 0.18 | -550.47 | -0.51      |
| Ta-Ga   |         | -539.96              | 0.19             | 0.09 | -539.86 | -0.30      | -552.51             | 0.64             | 0.16 | -552.03 | -0.45      |
|         |         | $E^*_{\text{HCOOH}}$ | $E_{\text{ZPE}}$ | TS   | $G$     | $\Delta G$ |                     |                  |      |         |            |
| Ta-Fe   |         | -561.63              | 0.91             | 0.25 | -560.97 | 1.21       |                     |                  |      |         |            |
| Ta-Co   |         | -560.43              | 0.91             | 0.24 | -559.76 | 1.40       |                     |                  |      |         |            |
| Ta-Ir   |         | -561.52              | 0.93             | 0.24 | -560.84 | 1.25       |                     |                  |      |         |            |
| Ta-Rh   |         | -560.31              | 0.92             | 0.25 | -559.63 | 1.27       |                     |                  |      |         |            |
| Ta-Ni   |         | -558.65              | 0.90             | 0.25 | -558.00 | 1.47       |                     |                  |      |         |            |
| Ta-Cu   |         | -555.57              | 0.88             | 0.20 | -554.89 | 1.49       |                     |                  |      |         |            |
| Ta-Zn   |         | -553.28              | 0.91             | 0.24 | -552.61 | 1.31       |                     |                  |      |         |            |
| Ta-Ga   |         | -554.44              | 0.89             | 0.14 | -553.69 | 1.79       |                     |                  |      |         |            |
|         |         | $E^*_{\text{H}}$     | $E_{\text{ZPE}}$ | TS   | $G$     | $\Delta G$ | $E^*_{\text{H}_2}$  | $E_{\text{ZPE}}$ | TS   | $G$     | $\Delta G$ |
| Ta-Fe   |         | -534.89              | 0.18             | 0.02 | -534.73 | -1.03      | -537.11             | 0.29             | 0.11 | -536.93 | 1.25       |
| Ta-Co   |         | -533.68              | 0.18             | 0.02 | -533.52 | -1.03      | -535.79             | 0.32             | 0.15 | -535.63 | 1.34       |
| Ta-Ir   |         | -534.66              | 0.18             | 0.01 | -534.49 | -0.96      | -536.84             | 0.30             | 0.14 | -536.69 | 1.25       |
| Ta-Rh   |         | -533.44              | 0.18             | 0.01 | -533.28 | -0.94      | -535.65             | 0.31             | 0.14 | -535.48 | 1.25       |
| Ta-Ni   |         | -532.06              | 0.18             | 0.02 | -531.90 | -1.05      | -534.15             | 0.32             | 0.16 | -533.99 | 1.35       |
| Ta-Cu   |         | -528.98              | 0.18             | 0.01 | -528.81 | -1.03      | -531.08             | 0.33             | 0.16 | -530.92 | 1.34       |
| Ta-Zn   |         | -526.66              | 0.18             | 0.02 | -526.50 | -1.00      | -528.80             | 0.31             | 0.17 | -528.66 | 1.29       |
| Ta-Ga   |         | -527.93              | 0.18             | 0.02 | -527.77 | -0.95      | -530.12             | 0.30             | 0.19 | -530.01 | 1.21       |

Table S12. The detailed electronic energy ( $E^*$ ), zero-point energy ( $E_{ZPE}$ ), entropy corrections ( $TS$ ), free energy ( $G$ ), and Gibbs free energy change ( $\Delta G$ ) of critical intermediate in V-based heteronuclear BACs during electrochemical CO<sub>2</sub>RR towards C1 product and competitive HER product.

| Species | $E^*$   | $E^*_{CO_2}$  | $E_{ZPE}$ | TS   | $G$     | $\Delta G$ | $E^*_{COOH}$ | $E_{ZPE}$ | TS   | $G$     | $\Delta G$ |
|---------|---------|---------------|-----------|------|---------|------------|--------------|-----------|------|---------|------------|
| V-Fe    | -528.40 | -552.25       | 0.32      | 0.15 | -552.08 | -0.48      | -555.76      | 0.64      | 0.15 | -555.27 | 0.01       |
| V-Co    | -527.11 | -550.86       | 0.32      | 0.11 | -550.65 | -0.34      | -553.71      | 0.63      | 0.16 | -553.24 | 0.61       |
| V-Ir    | -528.09 | -551.78       | 0.33      | 0.16 | -551.62 | -0.32      | -554.64      | 0.64      | 0.16 | -554.15 | 0.66       |
| V-Rh    | -526.82 | -550.48       | 0.33      | 0.15 | -550.31 | -0.28      | -553.21      | 0.64      | 0.16 | -552.73 | 0.78       |
| V-Ni    | -525.46 | -548.54       | 0.32      | 0.23 | -548.44 | 0.22       | -551.20      | 0.57      | 0.22 | -550.84 | 0.80       |
| V-Cu    | -522.25 | -545.31       | 0.33      | 0.22 | -545.21 | 0.25       | -548.14      | 0.62      | 0.18 | -547.70 | 0.70       |
| V-Zn    | -519.85 | -542.94       | 0.28      | 0.17 | -542.83 | 0.23       | -546.57      | 0.62      | 0.18 | -546.12 | -0.09      |
| V-Ga    | -521.41 | -545.31       | 0.31      | 0.15 | -545.15 | -0.53      | -548.51      | 0.63      | 0.18 | -548.06 | 0.29       |
|         |         | $E^*_{CO}$    | $E_{ZPE}$ | TS   | $G$     | $\Delta G$ | $E^*_{HCOO}$ | $E_{ZPE}$ | TS   | $G$     | $\Delta G$ |
| V-Fe    |         | -544.52       | 0.20      | 0.14 | -544.47 | -0.09      | -556.45      | 0.61      | 0.14 | -555.98 | -0.45      |
| V-Co    |         | -543.47       | 0.20      | 0.10 | -543.38 | -1.02      | -554.82      | 0.62      | 0.19 | -554.38 | -0.28      |
| V-Ir    |         | -544.46       | 0.20      | 0.16 | -544.42 | -1.16      | -555.78      | 0.61      | 0.22 | -555.39 | -0.33      |
| V-Rh    |         | -543.16       | 0.20      | 0.16 | -543.12 | -1.28      | -554.54      | 0.60      | 0.24 | -554.17 | -0.41      |
| V-Ni    |         | -541.62       | 0.20      | 0.15 | -541.57 | -1.61      | -553.24      | 0.61      | 0.22 | -552.85 | -0.96      |
| V-Cu    |         | -538.45       | 0.22      | 0.10 | -538.33 | -1.52      | -550.06      | 0.61      | 0.22 | -549.67 | -1.02      |
| V-Zn    |         | -536.07       | 0.20      | 0.10 | -535.97 | -0.74      | -548.03      | 0.63      | 0.19 | -547.60 | -1.32      |
| V-Ga    |         | -537.60       | 0.20      | 0.09 | -537.50 | -0.32      | -550.04      | 0.64      | 0.17 | -549.57 | -0.97      |
|         |         | $E^*_{HCOOH}$ | $E_{ZPE}$ | TS   | $G$     | $\Delta G$ |              |           |      |         |            |
| V-Fe    |         | -559.18       | 0.94      | 0.25 | -558.50 | 0.93       |              |           |      |         |            |
| V-Co    |         | -558.04       | 0.94      | 0.24 | -557.34 | 0.49       |              |           |      |         |            |
| V-Ir    |         | -559.07       | 0.94      | 0.23 | -558.36 | 0.49       |              |           |      |         |            |
| V-Rh    |         | -557.78       | 0.94      | 0.23 | -557.07 | 0.55       |              |           |      |         |            |
| V-Ni    |         | -556.01       | 0.93      | 0.25 | -555.33 | 0.97       |              |           |      |         |            |
| V-Cu    |         | -552.78       | 0.92      | 0.20 | -552.06 | 1.06       |              |           |      |         |            |
| V-Zn    |         | -550.40       | 0.92      | 0.20 | -549.68 | 1.37       |              |           |      |         |            |
| V-Ga    |         | -551.85       | 0.92      | 0.20 | -551.13 | 1.89       |              |           |      |         |            |
|         |         | $E^*_{H}$     | $E_{ZPE}$ | TS   | $G$     | $\Delta G$ | $E^*_{H_2}$  | $E_{ZPE}$ | TS   | $G$     | $\Delta G$ |
| V-Fe    |         | -532.00       | 0.17      | 0.02 | -531.84 | 0.00       | -535.15      | 0.30      | 0.21 | -535.05 | 0.24       |
| V-Co    |         | -530.78       | 0.18      | 0.02 | -530.62 | -0.06      | -533.86      | 0.31      | 0.19 | -533.74 | 0.33       |
| V-Ir    |         | -531.70       | 0.18      | 0.02 | -531.54 | -0.01      | -534.85      | 0.32      | 0.15 | -534.67 | 0.32       |
| V-Rh    |         | -530.43       | 0.17      | 0.02 | -530.27 | 0.00       | -533.58      | 0.32      | 0.16 | -533.43 | 0.30       |
| V-Ni    |         | -529.17       | 0.18      | 0.01 | -529.00 | -0.10      | -532.21      | 0.29      | 0.11 | -532.03 | 0.42       |
| V-Cu    |         | -525.94       | 0.17      | 0.01 | -525.78 | -0.08      | -528.98      | 0.28      | 0.09 | -528.79 | 0.43       |
| V-Zn    |         | -523.52       | 0.17      | 0.02 | -523.36 | -0.07      | -526.60      | 0.30      | 0.10 | -526.40 | 0.41       |
| V-Ga    |         | -525.08       | 0.17      | 0.02 | -524.92 | -0.06      | -528.17      | 0.30      | 0.13 | -528.00 | 0.37       |

Table S13. The detailed electronic energy ( $E^*$ ), zero-point energy ( $E_{ZPE}$ ), entropy corrections (TS), free energy ( $G$ ), and Gibbs free energy change ( $\Delta G$ ) of critical intermediate in Ti-based heteronuclear BACs during electrochemical CO<sub>2</sub>RR towards C1 product and competitive HER product.

| Species | $E^*$   | $E^*_{CO_2}$  | $E_{ZPE}$ | TS   | $G$     | $\Delta G$ | $E^*_{COOH}$ | $E_{ZPE}$ | TS   | $G$     | $\Delta G$ |
|---------|---------|---------------|-----------|------|---------|------------|--------------|-----------|------|---------|------------|
| Ti-Fe   | -527.65 | -551.90       | 0.32      | 0.16 | -551.74 | -0.89      | -555.39      | 0.64      | 0.16 | -554.91 | 0.03       |
| Ti-Co   | -526.44 | -550.64       | 0.32      | 0.17 | -550.49 | -0.85      | -553.70      | 0.64      | 0.16 | -553.23 | 0.46       |
| Ti-Ir   | -527.47 | -551.55       | 0.33      | 0.15 | -551.38 | -0.69      | -554.67      | 0.64      | 0.16 | -554.18 | 0.40       |
| Ti-Rh   | -526.20 | -550.25       | 0.32      | 0.17 | -550.10 | -0.69      | -553.22      | 0.64      | 0.16 | -552.74 | 0.56       |
| Ti-Ni   | -524.82 | -548.30       | 0.29      | 0.23 | -548.24 | -0.21      | -551.01      | 0.59      | 0.21 | -550.63 | 0.81       |
| Ti-Cu   | -521.65 | -545.17       | 0.32      | 0.09 | -544.95 | -0.09      | -548.03      | 0.60      | 0.21 | -547.65 | 0.50       |
| Ti-Zn   | -519.31 | -542.83       | 0.29      | 0.23 | -542.77 | -0.25      | -546.29      | 0.62      | 0.17 | -545.84 | 0.13       |
| Ti-Ga   | -520.88 | -545.19       | 0.30      | 0.16 | -545.05 | -0.96      | -548.53      | 0.63      | 0.18 | -548.08 | 0.16       |
|         |         | $E^*_{CO}$    | $E_{ZPE}$ | TS   | $G$     | $\Delta G$ | $E^*_{HCOO}$ | $E_{ZPE}$ | TS   | $G$     | $\Delta G$ |
| Ti-Fe   |         | -543.54       | 0.18      | 0.17 | -543.53 | 0.50       | -555.81      | 0.63      | 0.17 | -555.35 | -0.16      |
| Ti-Co   |         | -542.36       | 0.19      | 0.18 | -542.35 | -0.01      | -554.66      | 0.62      | 0.21 | -554.26 | -0.32      |
| Ti-Ir   |         | -543.35       | 0.19      | 0.16 | -543.33 | -0.03      | -555.62      | 0.60      | 0.25 | -555.27 | -0.44      |
| Ti-Rh   |         | -542.09       | 0.19      | 0.16 | -542.06 | -0.21      | -554.34      | 0.60      | 0.25 | -553.98 | -0.43      |
| Ti-Ni   |         | -540.83       | 0.19      | 0.16 | -540.80 | -1.06      | -553.13      | 0.61      | 0.24 | -552.77 | -1.09      |
| Ti-Cu   |         | -537.65       | 0.19      | 0.17 | -537.64 | -0.88      | -549.94      | 0.60      | 0.18 | -549.52 | -1.13      |
| Ti-Zn   |         | -535.32       | 0.18      | 0.18 | -535.31 | -0.36      | -547.61      | 0.63      | 0.18 | -547.16 | -0.95      |
| Ti-Ga   |         | -537.04       | 0.19      | 0.16 | -537.02 | 0.18       | -549.46      | 0.64      | 0.16 | -548.98 | -0.48      |
|         |         | $E^*_{HCOOH}$ | $E_{ZPE}$ | TS   | $G$     | $\Delta G$ |              |           |      |         |            |
| Ti-Fe   |         | -558.71       | 0.93      | 0.29 | -558.07 | 0.73       |              |           |      |         |            |
| Ti-Co   |         | -557.55       | 0.93      | 0.27 | -556.89 | 0.82       |              |           |      |         |            |
| Ti-Ir   |         | -558.60       | 0.93      | 0.25 | -557.92 | 0.79       |              |           |      |         |            |
| Ti-Rh   |         | -557.33       | 0.93      | 0.26 | -556.65 | 0.78       |              |           |      |         |            |
| Ti-Ni   |         | -555.95       | 0.93      | 0.25 | -555.27 | 0.95       |              |           |      |         |            |
| Ti-Cu   |         | -552.79       | 0.93      | 0.24 | -552.10 | 0.87       |              |           |      |         |            |
| Ti-Zn   |         | -550.44       | 0.93      | 0.25 | -549.76 | 0.85       |              |           |      |         |            |
| Ti-Ga   |         | -552.07       | 0.91      | 0.18 | -551.34 | 1.09       |              |           |      |         |            |
|         |         | $E^*_{H}$     | $E_{ZPE}$ | TS   | $G$     | $\Delta G$ | $E^*_{H_2}$  | $E_{ZPE}$ | TS   | $G$     | $\Delta G$ |
| Ti-Fe   |         | -531.15       | 0.15      | 0.02 | -531.02 | 0.07       | -534.40      | 0.29      | 0.11 | -534.22 | 0.25       |
| Ti-Co   |         | -529.99       | 0.15      | 0.02 | -529.86 | 0.03       | -533.19      | 0.31      | 0.13 | -533.01 | 0.29       |
| Ti-Ir   |         | -530.94       | 0.15      | 0.02 | -530.81 | 0.11       | -534.23      | 0.32      | 0.17 | -534.09 | 0.17       |
| Ti-Rh   |         | -529.61       | 0.15      | 0.02 | -529.48 | 0.17       | -532.96      | 0.32      | 0.17 | -532.82 | 0.11       |
| Ti-Ni   |         | -528.56       | 0.16      | 0.02 | -528.43 | -0.16      | -531.58      | 0.31      | 0.14 | -531.41 | 0.46       |
| Ti-Cu   |         | -525.37       | 0.15      | 0.02 | -525.24 | -0.14      | -528.40      | 0.31      | 0.14 | -528.23 | 0.46       |

|       |         |      |      |         |       |         |      |      |         |      |
|-------|---------|------|------|---------|-------|---------|------|------|---------|------|
| Ti-Zn | -523.02 | 0.15 | 0.02 | -522.89 | -0.14 | -526.06 | 0.30 | 0.16 | -525.92 | 0.41 |
| Ti-Ga | -524.91 | 0.15 | 0.02 | -524.78 | -0.46 | -527.64 | 0.31 | 0.20 | -527.53 | 0.70 |

Table S14. The detailed electronic energy ( $E^*$ ), zero-point energy ( $E_{ZPE}$ ), entropy corrections (TS), free energy ( $G$ ), and Gibbs free energy change ( $\Delta G$ ) of critical intermediate in Cr-based heteronuclear BACs during electrochemical CO<sub>2</sub>RR towards C1 product and competitive HER product.

| Species | $E^*$   | $E^*_{CO_2}$  | $E_{ZPE}$ | TS   | $G$     | $\Delta G$ | $E^*_{COOH}$ | $E_{ZPE}$ | TS   | $G$     | $\Delta G$ |
|---------|---------|---------------|-----------|------|---------|------------|--------------|-----------|------|---------|------------|
| Cr-Fe   | -528.49 | -551.91       | 0.32      | 0.15 | -551.73 | -0.03      | -555.26      | 0.64      | 0.15 | -554.77 | 0.16       |
| Cr-Co   | -527.53 | -550.63       | 0.32      | 0.25 | -550.56 | 0.18       | -553.45      | 0.64      | 0.16 | -552.97 | 0.78       |
| Cr-Ir   | -528.42 | -551.54       | 0.32      | 0.24 | -551.46 | 0.17       | -554.57      | 0.63      | 0.22 | -554.16 | 0.50       |
| Cr-Rh   | -527.15 | -550.26       | 0.32      | 0.23 | -550.17 | 0.19       | -553.11      | 0.63      | 0.21 | -552.70 | 0.67       |
| Cr-Ni   | -525.56 | -548.65       | 0.32      | 0.25 | -548.58 | 0.19       | -550.63      | 0.57      | 0.23 | -550.29 | 1.49       |
| Cr-Cu   | -522.30 | -545.38       | 0.32      | 0.22 | -545.28 | 0.23       | -547.75      | 0.62      | 0.17 | -547.30 | 1.17       |
| Cr-Zn   | -519.81 | -542.89       | 0.31      | 0.19 | -542.77 | 0.25       | -546.09      | 0.63      | 0.17 | -545.63 | 0.34       |
| Cr-Ga   | -521.52 | -544.65       | 0.32      | 0.15 | -544.49 | 0.24       | -548.38      | 0.60      | 0.20 | -547.98 | -0.29      |
|         |         | $E^*_{CO}$    | $E_{ZPE}$ | TS   | $G$     | $\Delta G$ | $E^*_{HCOO}$ | $E_{ZPE}$ | TS   | $G$     | $\Delta G$ |
| Cr-Fe   |         | -544.63       | 0.21      | 0.12 | -544.54 | -0.65      | -555.99      | 0.62      | 0.19 | -555.55 | -0.37      |
| Cr-Co   |         | -543.49       | 0.35      | 0.23 | -543.37 | -1.28      | -554.40      | 0.61      | 0.15 | -553.94 | 0.06       |
| Cr-Ir   |         | -544.41       | 0.19      | 0.10 | -544.32 | -1.05      | -555.23      | 0.60      | 0.17 | -554.80 | 0.10       |
| Cr-Rh   |         | -543.12       | 0.14      | 0.23 | -543.21 | -1.40      | -553.98      | 0.61      | 0.22 | -553.59 | 0.03       |
| Cr-Ni   |         | -541.52       | 0.14      | 0.18 | -541.57 | -2.17      | -552.52      | 0.61      | 0.21 | -552.12 | -0.09      |
| Cr-Cu   |         | -538.29       | 0.15      | 0.19 | -538.33 | -1.91      | -549.32      | 0.63      | 0.16 | -548.84 | -0.11      |
| Cr-Zn   |         | -535.88       | 0.15      | 0.22 | -535.96 | -1.22      | -547.44      | 0.64      | 0.17 | -546.97 | -0.76      |
| Cr-Ga   |         | -537.47       | 0.15      | 0.18 | -537.49 | -0.40      | -549.59      | 0.64      | 0.16 | -549.11 | -1.18      |
|         |         | $E^*_{HCOOH}$ | $E_{ZPE}$ | TS   | $G$     | $\Delta G$ |              |           |      |         |            |
| Cr-Fe   |         | -558.75       | 0.94      | 0.22 | -558.03 | 0.97       |              |           |      |         |            |
| Cr-Co   |         | -557.62       | 0.91      | 0.27 | -556.97 | 0.42       |              |           |      |         |            |
| Cr-Ir   |         | -558.55       | 0.91      | 0.26 | -557.90 | 0.35       |              |           |      |         |            |
| Cr-Rh   |         | -557.27       | 0.91      | 0.27 | -556.62 | 0.41       |              |           |      |         |            |
| Cr-Ni   |         | -555.62       | 0.91      | 0.20 | -554.91 | 0.66       |              |           |      |         |            |
| Cr-Cu   |         | -552.40       | 0.90      | 0.22 | -551.72 | 0.57       |              |           |      |         |            |
| Cr-Zn   |         | -549.98       | 0.91      | 0.20 | -549.28 | 1.14       |              |           |      |         |            |
| Cr-Ga   |         | -551.81       | 0.91      | 0.10 | -551.01 | 1.55       |              |           |      |         |            |
|         |         | $E^*_{H}$     | $E_{ZPE}$ | TS   | $G$     | $\Delta G$ | $E^*_{H_2}$  | $E_{ZPE}$ | TS   | $G$     | $\Delta G$ |
| Cr-Fe   |         | -532.04       | 0.19      | 0.01 | -531.87 | 0.07       | -535.37      | 0.30      | 0.16 | -535.23 | 0.08       |
| Cr-Co   |         | -530.88       | 0.20      | 0.01 | -530.69 | 0.29       | -534.28      | 0.30      | 0.14 | -534.11 | 0.03       |
| Cr-Ir   |         | -531.81       | 0.19      | 0.01 | -531.63 | 0.24       | -535.18      | 0.32      | 0.17 | -535.03 | 0.05       |
| Cr-Rh   |         | -530.53       | 0.19      | 0.01 | -530.35 | 0.25       | -533.91      | 0.32      | 0.17 | -533.76 | 0.03       |

|       |         |      |      |         |      |         |      |      |         |       |
|-------|---------|------|------|---------|------|---------|------|------|---------|-------|
| Cr-Ni | -528.89 | 0.20 | 0.01 | -528.71 | 0.30 | -532.30 | 0.28 | 0.10 | -532.13 | 0.03  |
| Cr-Cu | -525.65 | 0.19 | 0.01 | -525.47 | 0.28 | -529.05 | 0.28 | 0.09 | -528.86 | 0.06  |
| Cr-Zn | -523.21 | 0.19 | 0.01 | -523.03 | 0.23 | -526.49 | 0.32 | 0.10 | -526.27 | 0.20  |
| Cr-Ga | -524.66 | 0.19 | 0.01 | -524.48 | 0.49 | -528.27 | 0.29 | 0.12 | -528.11 | -0.18 |

Table S15. The detailed electronic energy ( $E^*$ ), zero-point energy ( $E_{ZPE}$ ), entropy corrections (TS), free energy ( $G$ ), and Gibbs free energy change ( $\Delta G$ ) of critical intermediate in Mn-based heteronuclear BACs during electrochemical CO<sub>2</sub>RR towards C1 product and competitive HER product.

| Species | $E^*$   | $E^*_{CO_2}$  | $E_{ZPE}$ | TS   | $G$     | $\Delta G$ | $E^*_{COOH}$ | $E_{ZPE}$ | TS   | $G$     | $\Delta G$ |
|---------|---------|---------------|-----------|------|---------|------------|--------------|-----------|------|---------|------------|
| Mn-Fe   | -528.19 | -551.38       | 0.39      | 0.15 | -551.14 | 0.26       | -554.77      | 0.61      | 0.16 | -554.33 | 0.01       |
| Mn-Co   | -526.94 | -550.04       | 0.32      | 0.24 | -549.96 | 0.19       | -552.72      | 0.62      | 0.17 | -552.27 | 0.88       |
| Mn-Ir   | -527.81 | -550.92       | 0.32      | 0.24 | -550.83 | 0.18       | -553.73      | 0.63      | 0.16 | -553.26 | 0.77       |
| Mn-Rh   | -526.56 | -549.67       | 0.32      | 0.23 | -549.58 | 0.19       | -552.32      | 0.62      | 0.17 | -551.87 | 0.91       |
| Mn-Ni   | -524.73 | -547.83       | 0.32      | 0.24 | -547.76 | 0.18       | -549.94      | 0.59      | 0.18 | -549.54 | 1.41       |
| Mn-Cu   | -521.57 | -544.67       | 0.32      | 0.23 | -544.58 | 0.20       | -546.68      | 0.58      | 0.20 | -546.30 | 1.48       |
| Mn-Zn   | -519.20 | -542.30       | 0.31      | 0.19 | -542.17 | 0.23       | -545.34      | 0.60      | 0.19 | -544.93 | 0.44       |
| Mn-Ga   | -521.30 | -544.41       | 0.32      | 0.24 | -544.34 | 0.17       | -548.00      | 0.61      | 0.19 | -547.58 | -0.04      |
|         |         | $E^*_{CO}$    | $E_{ZPE}$ | TS   | $G$     | $\Delta G$ | $E^*_{HCOO}$ | $E_{ZPE}$ | TS   | $G$     | $\Delta G$ |
| Mn-Fe   |         | -544.11       | 0.29      | 0.07 | -543.90 | -0.46      | -554.54      | 0.60      | 0.17 | -554.11 | 0.48       |
| Mn-Co   |         | -542.77       | 0.22      | 0.13 | -542.68 | -1.29      | -553.17      | 0.61      | 0.17 | -552.72 | 0.68       |
| Mn-Ir   |         | -543.58       | 0.21      | 0.09 | -543.46 | -1.09      | -554.01      | 0.61      | 0.22 | -553.62 | 0.66       |
| Mn-Rh   |         | -542.38       | 0.22      | 0.14 | -542.30 | -1.32      | -552.78      | 0.61      | 0.22 | -552.40 | 0.63       |
| Mn-Ni   |         | -540.65       | 0.21      | 0.08 | -540.51 | -1.86      | -551.21      | 0.61      | 0.22 | -550.82 | 0.38       |
| Mn-Cu   |         | -537.38       | 0.23      | 0.07 | -537.23 | -1.82      | -547.96      | 0.61      | 0.14 | -547.49 | 0.54       |
| Mn-Zn   |         | -535.04       | 0.20      | 0.03 | -534.87 | -0.82      | -545.71      | 0.63      | 0.18 | -545.26 | 0.36       |
| Mn-Ga   |         | -537.05       | 0.23      | 0.08 | -536.90 | -0.21      | -547.88      | 0.63      | 0.18 | -547.43 | 0.36       |
|         |         | $E^*_{HCOOH}$ | $E_{ZPE}$ | TS   | $G$     | $\Delta G$ |              |           |      |         |            |
| Mn-Fe   |         | -558.42       | 0.91      | 0.26 | -557.77 | -0.21      |              |           |      |         |            |
| Mn-Co   |         | -557.07       | 0.91      | 0.28 | -556.44 | -0.27      |              |           |      |         |            |
| Mn-Ir   |         | -557.95       | 0.91      | 0.27 | -557.32 | -0.25      |              |           |      |         |            |
| Mn-Rh   |         | -556.73       | 0.91      | 0.26 | -556.07 | -0.23      |              |           |      |         |            |
| Mn-Ni   |         | -554.86       | 0.91      | 0.22 | -554.17 | 0.10       |              |           |      |         |            |
| Mn-Cu   |         | -551.74       | 0.94      | 0.23 | -551.04 | -0.10      |              |           |      |         |            |
| Mn-Zn   |         | -549.42       | 0.91      | 0.27 | -548.77 | -0.07      |              |           |      |         |            |
| Mn-Ga   |         | -551.49       | 0.92      | 0.18 | -550.76 | 0.12       |              |           |      |         |            |
|         |         | $E^*_{H}$     | $E_{ZPE}$ | TS   | $G$     | $\Delta G$ | $E^*_{H_2}$  | $E_{ZPE}$ | TS   | $G$     | $\Delta G$ |
| Mn-Fe   |         | -531.49       | 0.20      | 0.01 | -531.29 | 0.34       | -535.03      | 0.32      | 0.17 | -534.89 | -0.15      |
| Mn-Co   |         | -530.14       | 0.20      | 0.01 | -529.94 | 0.44       | -533.68      | 0.29      | 0.05 | -533.45 | -0.06      |

|       |         |      |      |         |      |         |      |      |         |       |
|-------|---------|------|------|---------|------|---------|------|------|---------|-------|
| Mn-Ir | -531.01 | 0.20 | 0.01 | -530.81 | 0.44 | -534.56 | 0.29 | 0.05 | -534.31 | -0.05 |
| Mn-Rh | -529.75 | 0.20 | 0.01 | -529.56 | 0.45 | -533.32 | 0.29 | 0.11 | -533.14 | -0.13 |
| Mn-Ni | -528.01 | 0.20 | 0.01 | -527.82 | 0.36 | -531.49 | 0.30 | 0.04 | -531.24 | 0.03  |
| Mn-Cu | -524.75 | 0.20 | 0.01 | -524.55 | 0.46 | -528.19 | 0.35 | 0.05 | -527.89 | 0.12  |
| Mn-Zn | -522.38 | 0.13 | 0.01 | -522.25 | 0.39 | -525.96 | 0.29 | 0.13 | -525.80 | -0.09 |
| Mn-Ga | -524.47 | 0.19 | 0.01 | -524.29 | 0.46 | -528.05 | 0.29 | 0.12 | -527.89 | -0.15 |

Table S16. The detailed electronic energy ( $E^*$ ), zero-point energy ( $E_{ZPE}$ ), entropy corrections (TS), and free energy ( $G$ ) of isolated molecule during electrochemical CO<sub>2</sub>RR towards C1 product and competitive HER product.

| Species          | $E^*$  | $E_{ZPE}$ | TS   | $G$    |
|------------------|--------|-----------|------|--------|
| CO <sub>2</sub>  | -22.96 | 0.31      | 0.66 | -23.21 |
| CO               | -14.84 | 0.14      | 0.61 | -15.31 |
| H <sub>2</sub> O | -14.25 | 0.59      | 0.58 | -14.24 |
| H <sub>2</sub>   | -6.76  | 0.27      | 0.40 | -6.89  |
| HCOOH            | -29.97 | 0.90      | 0.99 | -30.06 |

In this work, we consider two coordination forms of BACs, i.e., 3-coordinated and 4-coordinated metal-anchored N-doped graphene, as shown in Fig. S1. We select three metals, Fe, Mn, and Mo, as the representative to compare the DFT energy of the different coordination forms. Due to the significantly lower energy of 4-coordinated form, thus all of our subsequent investigation are based on the 4-coordinated form of BACs.



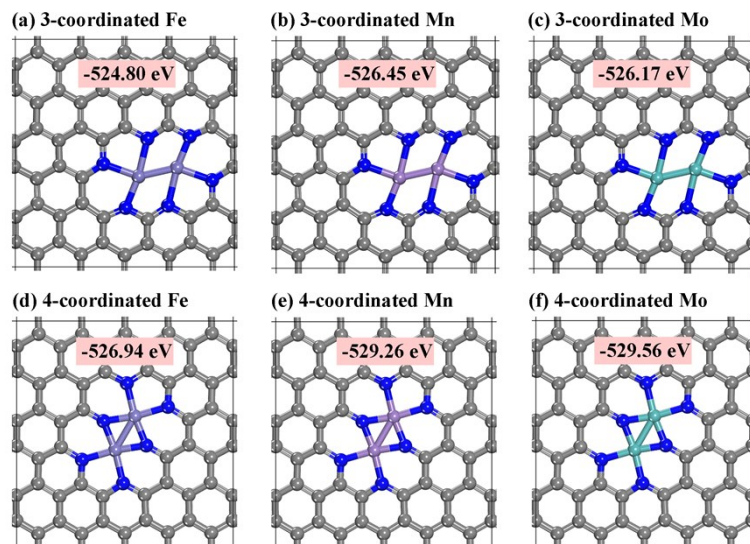

Fig. S1 The most stable structures and the DFT energy of 3-coordinated and 4-coordinated metal-anchored N-doped graphene homonuclear BACs.

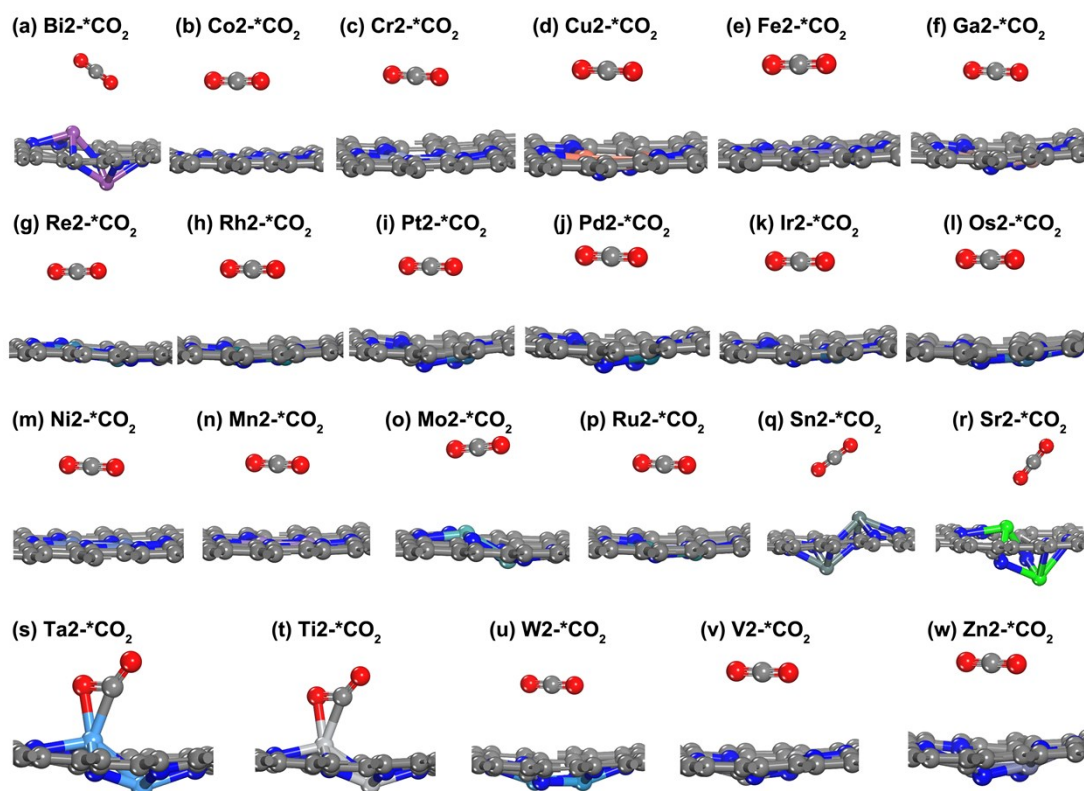

Fig. S2 The most stable structures of \*CO<sub>2</sub> adsorbed on 23 kinds of homonuclear BACs.

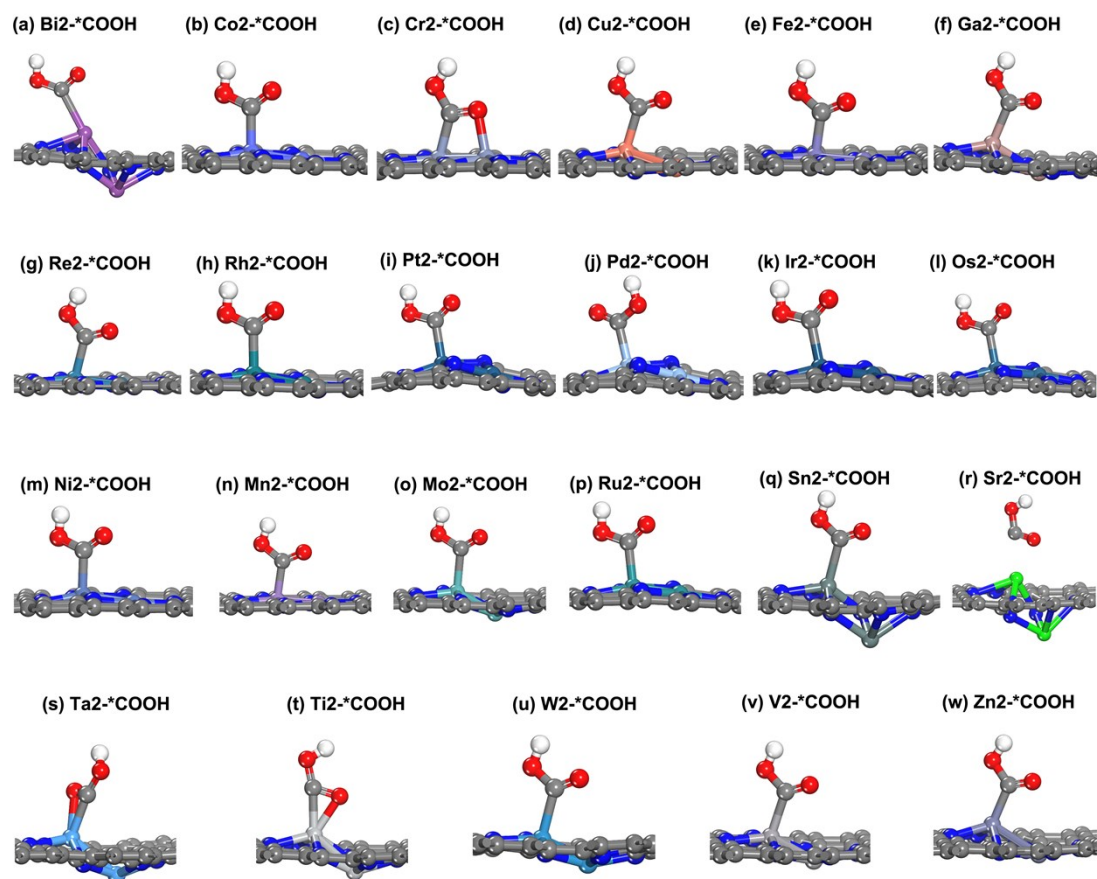

Fig. S3 The most stable structures of \*COOH adsorbed on 23 kinds of homonuclear BACs.

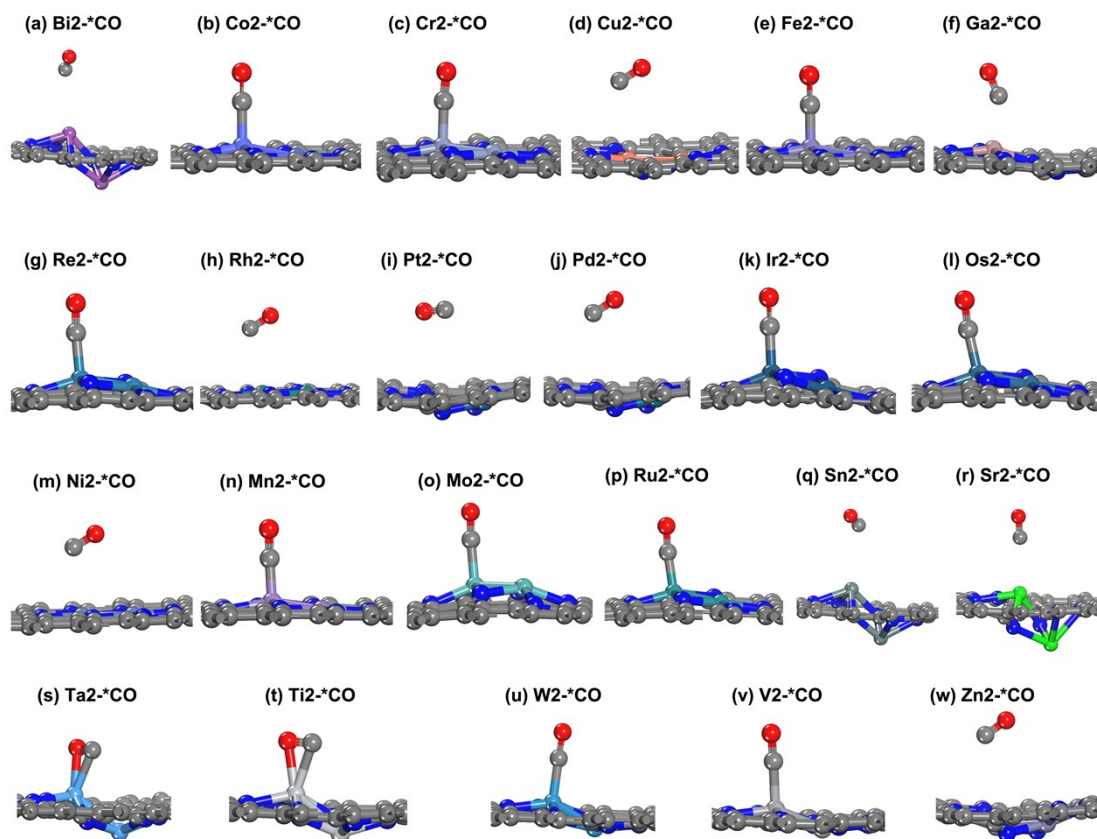

Fig. S4 The most stable structures of \*CO adsorbed on 23 kinds of homonuclear BACs.

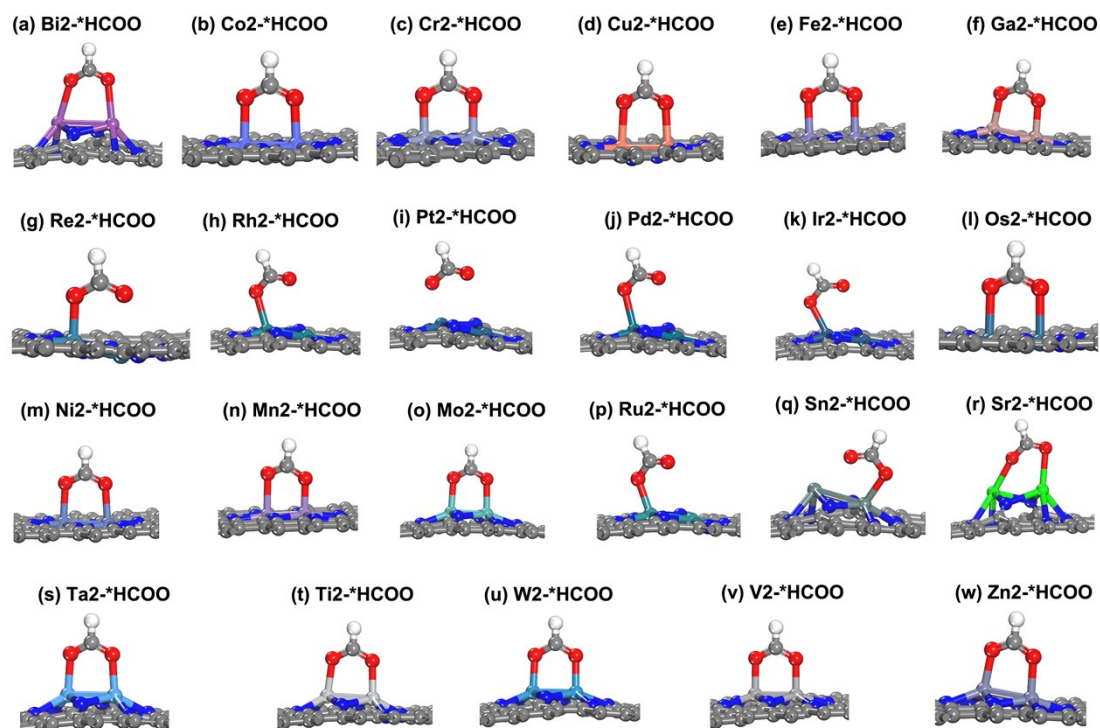

Fig. S5 The most stable structures of \*HCOO adsorbed on 23 kinds of homonuclear

BACs.

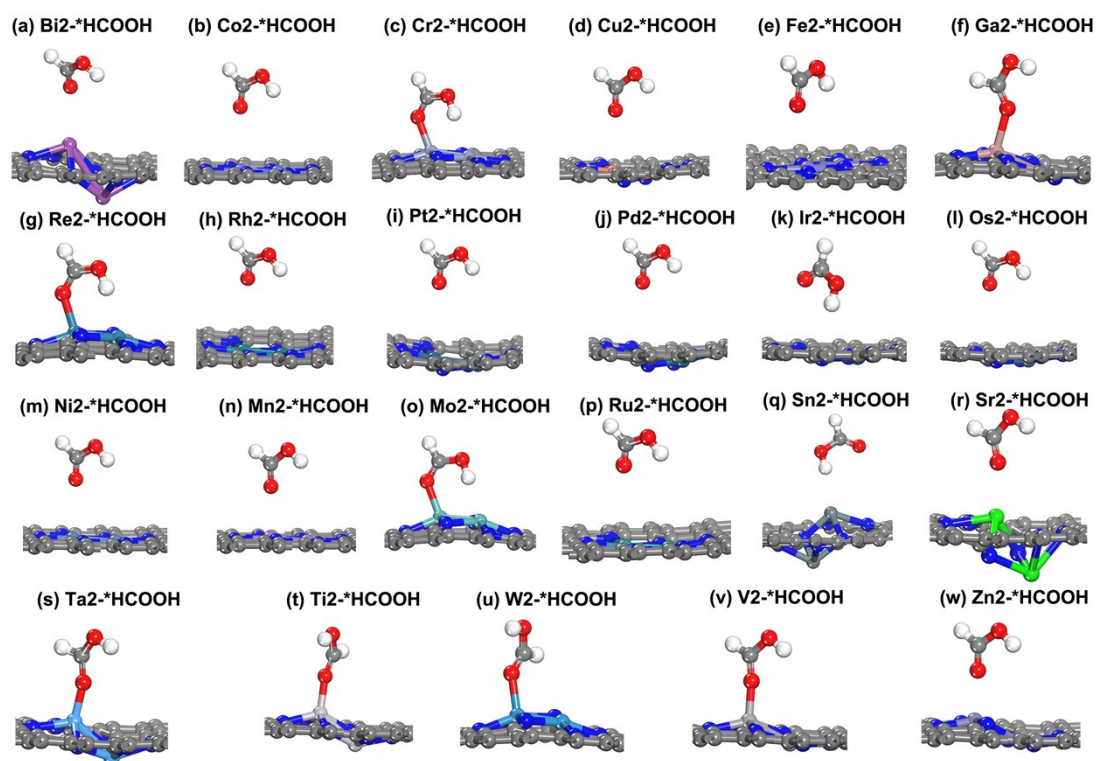

Fig. S6 The most stable structures of \*HCOOH adsorbed on 23 kinds of homonuclear BACs.

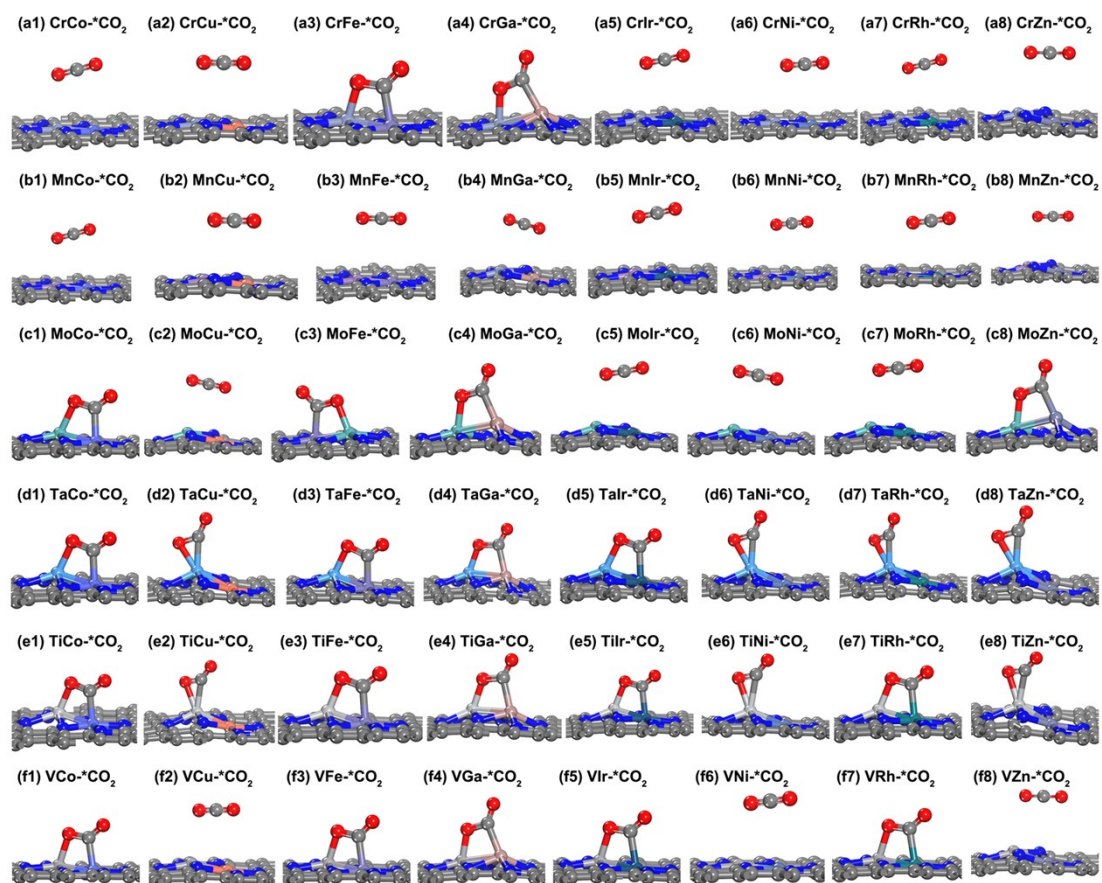

Fig. S7 The most stable structures of \*CO<sub>2</sub> adsorbed on 48 kinds of heteronuclear BACs.

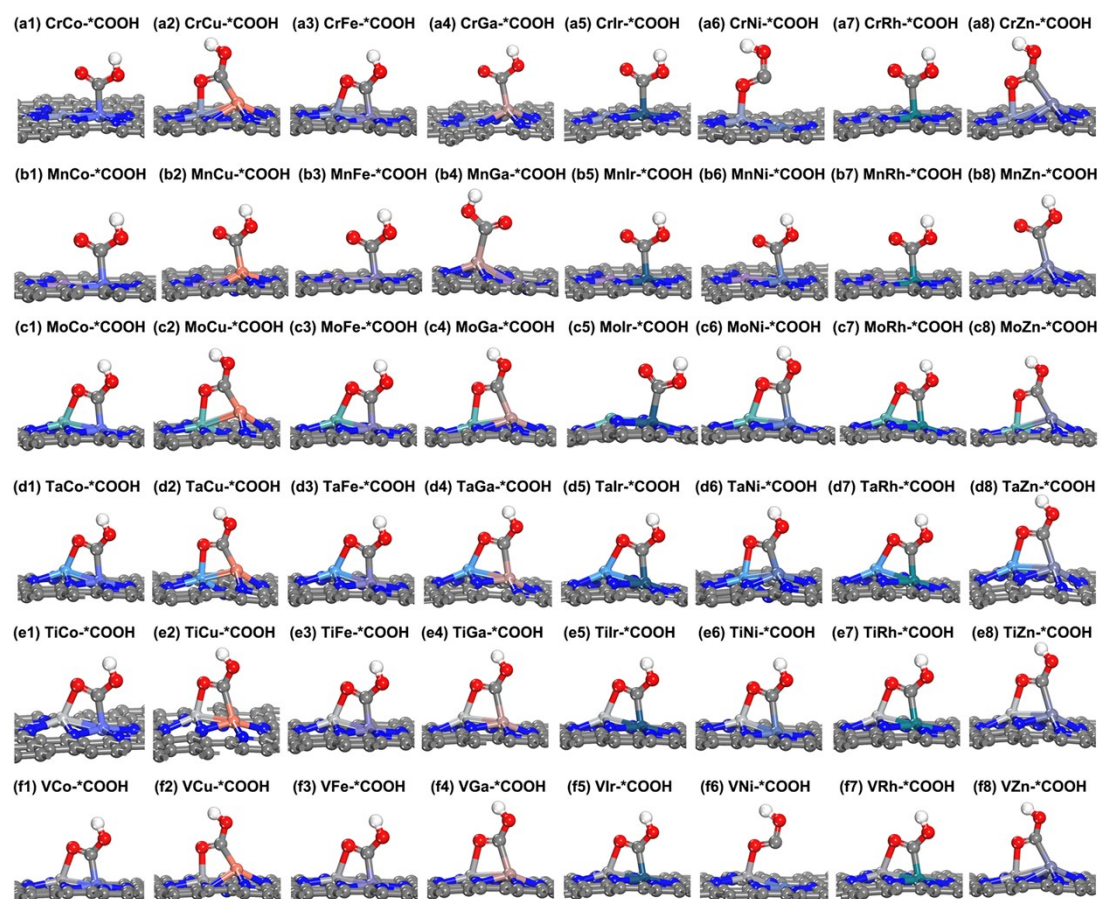

Fig. S8 The most stable structures of \*COOH adsorbed on 48 kinds of heteronuclear BACs.

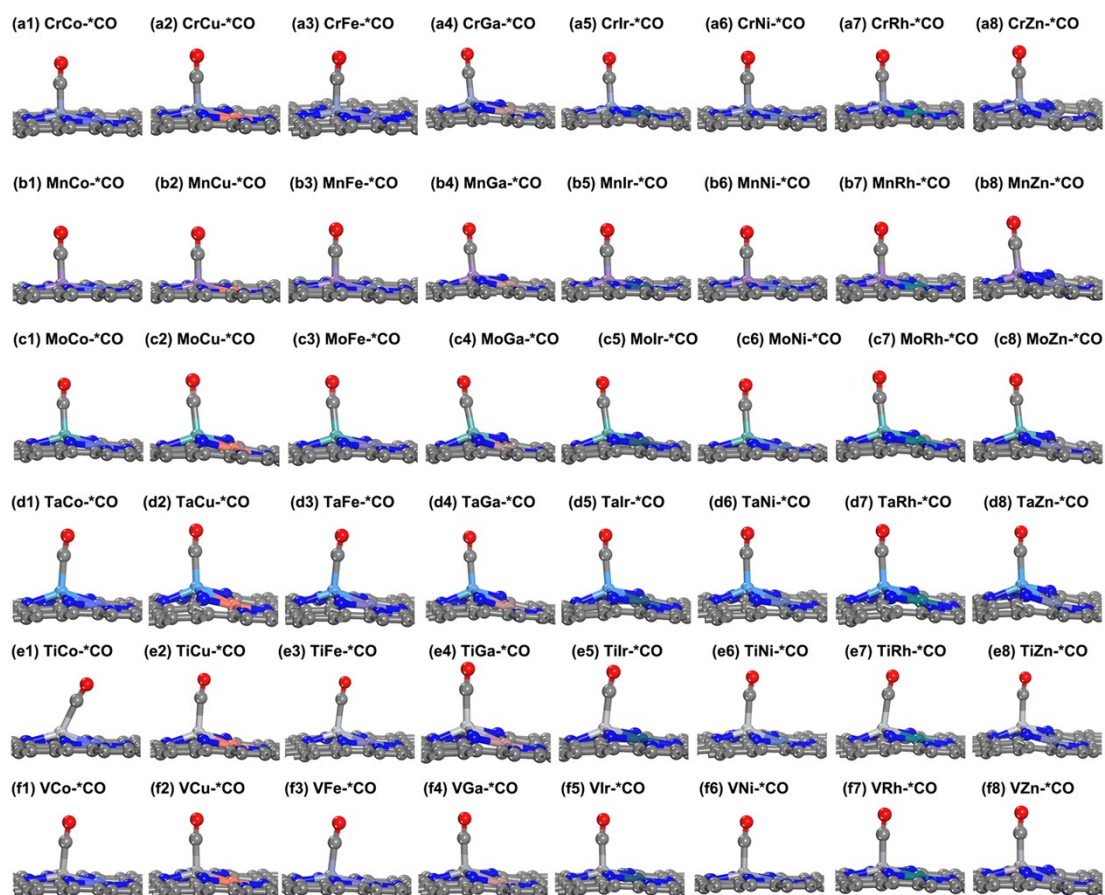

Fig. S9 The most stable structures of \*CO adsorbed on 48 kinds of heteronuclear BACs.

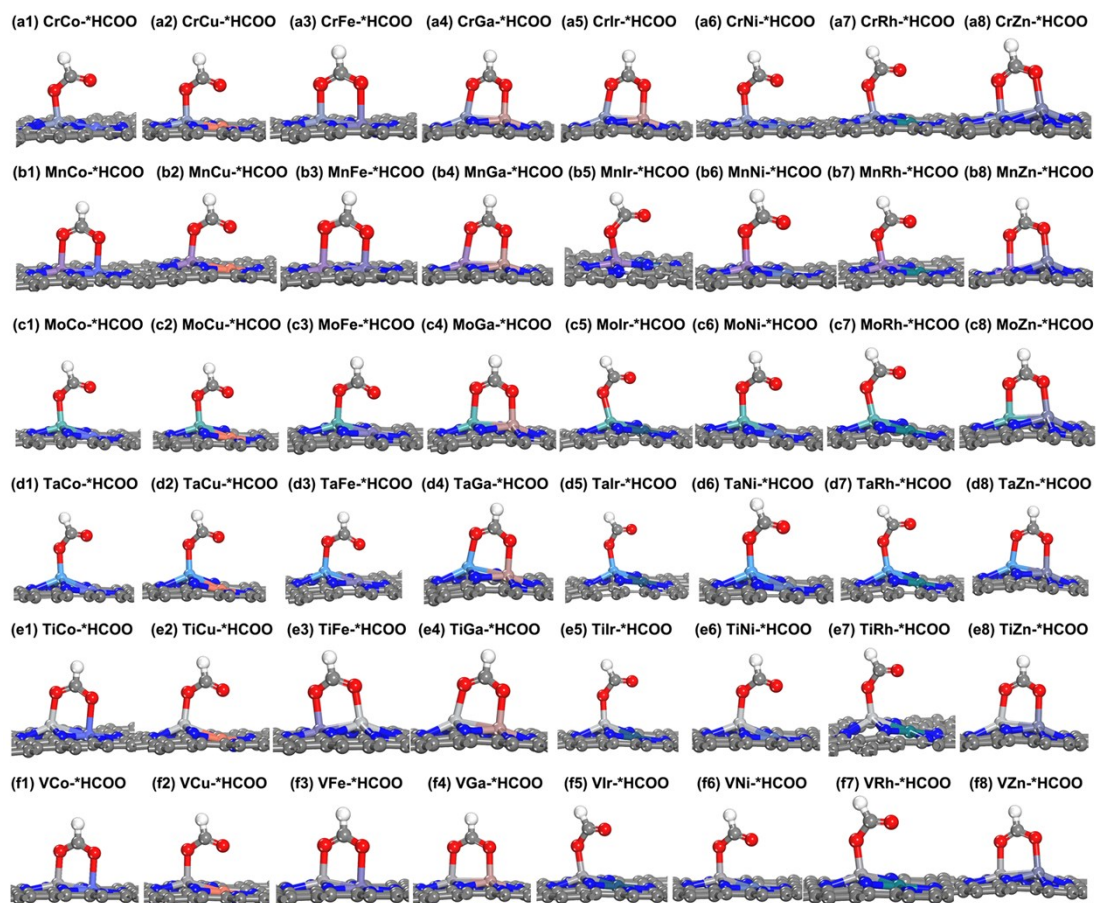

Fig. S10 The most stable structures of \*HCOO adsorbed on 48 kinds of heteronuclear BACs.



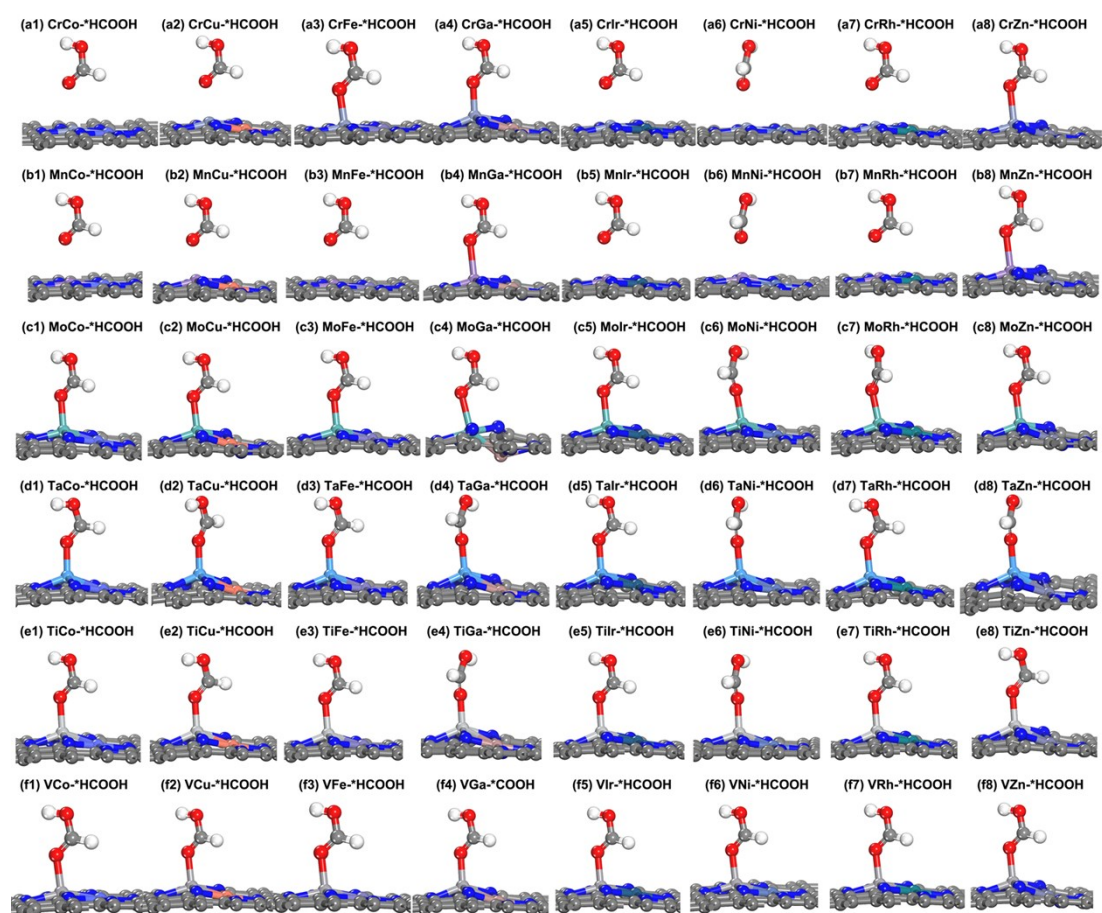

Fig. S11 The most stable structures of \*HCOOH adsorbed on 48 kinds of heteronuclear BACs.

## REFERENCES

1. X. Y. Guo, J. X. Gu, S. R. Lin, S. L. Zhang, Z. F. Chen and S. P. Huang, *J. Am. Chem. Soc.*, 2020, **142**, 5709-5721.
